# Supplementary material
Source: PubMed Central journal article supplement (PMC6427821)

# Defining and Detecting Complex Peak Relationships in Mass Spectral Data: The mz.unity Algorithm

---

Nathaniel G. Mahieu<sup>1,3,\*</sup>, Jonathan L. Spalding<sup>1,2</sup>, Susan J. Gelman<sup>1,3</sup>, Gary J. Patti<sup>1,3,\*</sup>

<sup>1</sup>Department of Chemistry, Washington University, St. Louis, MO 63130, USA, <sup>2</sup>Department of Genetics, <sup>3</sup>Department of Medicine, Washington University School of Medicine, St. Louis, MO 63110, USA

\*Corresponding Authors: nathaniel.mahieu@wustl.edu and gjpattij@wustl.edu

## CONTENTS

|                 |                                                                                      |    |
|-----------------|--------------------------------------------------------------------------------------|----|
| Supplement S1.  | Description of the combinatorial search problem for complex peak relationships. .... | 2  |
| Supplement S2.  | Features from negative mode included in the composite spectrum .....                 | 3  |
| Supplement S3.  | Features from positive mode included in the composite spectrum .....                 | 4  |
| Supplement S4.  | Background peaks from positive mode .....                                            | 6  |
| Supplement S5.  | Background peaks from negative mode.....                                             | 8  |
| Supplement S6.  | Composite spectrum from 21-22 minutes of a HILIC analysis of E. coli extract.....    | 9  |
| Supplement S7.  | List of granular formula used .....                                                  | 10 |
| 7.1             | Isotopes: M.iso.....                                                                 | 10 |
| 7.2             | Charge Carriers: M.z.....                                                            | 10 |
| 7.3             | Neutral Formula: M.n .....                                                           | 10 |
| Supplement S8.  | Mz.unity parameters used for annotation of the composite spectrum .....              | 11 |
| 8.1             | Find peaks with isotope support for higher charge states .....                       | 11 |
| 8.2             | Find peaks with isotope support for charge state $z = 1$ .....                       | 11 |
| 8.3             | Annotate simple relationships.....                                                   | 11 |
| 8.4             | Annotate analyte-analyte mers and distal fragments.....                              | 11 |
| 8.5             | Annotate analyte-analyte mers and distal fragments across polarities .....           | 11 |
| 8.6             | Annotate background mers .....                                                       | 11 |
| Supplement S9.  | Fragmentation spectrum of NAD .....                                                  | 12 |
| Supplement S10. | Fragmentation spectrum of glutamate .....                                            | 13 |
| Supplement S11. | Annotation of 2-hydroxyglutarate Metabolic Products.....                             | 14 |
| Supplement S12. | Intensities, Masses, and Retention Times of Adducts.....                             | 15 |

**SUPPLEMENT S1. DESCRIPTION OF THE COMBINATORIAL SEARCH PROBLEM FOR COMPLEX PEAK RELATIONSHIPS.**

Let  $O$  be the set of all observed  $\langle m, z \rangle$ . Let  $M$  be a user supplied set of  $\langle m, z \rangle$ . Find multisets  $R$  and  $S$  that satisfy:

$$R, S \subset O \cup M$$

$$R, S \not\subset M$$

$$R \cap S = \emptyset$$

$$\sum_{x \in R} x_m - \sum_{x \in S} x_m < \delta$$

$$\sum_{x \in R} x_z - \sum_{x \in S} x_z = 0$$

$$\delta = \frac{\varepsilon}{1E6} * \sum_{x \in R, S \cap O} \frac{x_m}{|x_z|}$$

Given a set of  $\langle m, z \rangle$  pairs where  $m$  and  $z$  are positive or negative real numbers, find two sub-multisets whose summed mass is within error  $\delta$  and whose summed charge is equal. Exclude pairs of multisets which share a member.

In broader terms, we have found a set of mass and charge transformations (corresponding to deprotonation, adduction, etc.) which convert a detected  $\langle m, z \rangle$  value to a second  $\langle m, z \rangle$  value. Thus this search ensures that the transformations of each  $\langle m, z \rangle$  as described by members of each multiset results in an equal mass and charge.

**SUPPLEMENT S2. FEATURES FROM NEGATIVE MODE INCLUDED IN THE COMPOSITE SPECTRUM**

| mz       | maxo     | source | mz       | maxo     | source |
|----------|----------|--------|----------|----------|--------|
| -146.046 | 2.76E+09 | Psn    | -400.134 | 1216220  | psn    |
| -128.035 | 3.52E+08 | Psn    | -188.002 | 1182428  | psn    |
| -102.056 | 3.12E+08 | Psn    | -665.11  | 1176081  | psn    |
| -147.049 | 1.64E+08 | Psn    | -542.059 | 1156010  | psn    |
| -662.102 | 1.37E+08 | Psn    | -189.088 | 1126616  | psn    |
| -231.098 | 1.15E+08 | psn    | -246.118 | 1123492  | psn    |
| -132.03  | 58812040 | psn    | -540.039 | 1110298  | psn    |
| -331.055 | 44957360 | psn    | -269.054 | 1099994  | psn    |
| -809.155 | 35751240 | psn    | -848.114 | 1090830  | psn    |
| -663.105 | 32867860 | psn    | -335.055 | 952685.8 | psn    |
| -540.054 | 31911818 | psn    | -206.012 | 938092.4 | psn    |
| -348.087 | 30048056 | psn    | -301.065 | 923233.9 | psn    |
| -293.099 | 29273104 | psn    | -516.063 | 921326.4 | psn    |
| -315.081 | 28147298 | psn    | -894.207 | 886170.4 | psn    |
| -148.05  | 24049586 | psn    | -500.09  | 873459.1 | psn    |
| -129.038 | 20168718 | psn    | -232.096 | 835217.1 | psn    |
| -103.059 | 15625474 | psn    | -345.178 | 834453.8 | psn    |
| -147.043 | 12138567 | psn    | -450.11  | 815158.2 | psn    |
| -283.068 | 11558971 | psn    | -456.246 | 809889.1 | psn    |
| -232.102 | 11044240 | psn    | -994.657 | 808162.4 | psn    |
| -245.114 | 10539088 | psn    | -881.311 | 808151.8 | psn    |
| -810.158 | 9959694  | psn    | -572.344 | 790534.1 | psn    |
| -664.108 | 6937656  | psn    | -134.034 | 789540.4 | psn    |
| -541.057 | 5288482  | psn    | -100.04  | 785416.2 | psn    |
| -662.603 | 5039852  | psn    | -187.109 | 781978.1 | psn    |
| -332.058 | 4757833  | psn    | -115.003 | 758465.8 | psn    |
| -306.077 | 4592574  | psn    | -456.166 | 758344.9 | psn    |
| -758.09  | 4585383  | psn    | -832.14  | 720119.6 | psn    |
| -88.0403 | 4487963  | psn    | -333.059 | 683614.1 | psn    |
| -168.028 | 3955738  | psn    | -875.176 | 680699.4 | psn    |
| -357.087 | 3907644  | psn    | -687.107 | 673873.8 | psn    |
| -129.019 | 3892937  | psn    | -337.063 | 672261.3 | psn    |
| -333.053 | 3772248  | psn    | -598.36  | 661826.6 | psn    |
| -294.102 | 3454026  | psn    |          |          |        |
| -320.011 | 3302731  | psn    |          |          |        |
| -847.11  | 3277035  | psn    |          |          |        |
| -184.001 | 3091660  | psn    |          |          |        |
| -349.09  | 3036758  | psn    |          |          |        |
| -316.084 | 2891467  | psn    |          |          |        |
| -133.033 | 2886159  | psn    |          |          |        |
| -148.052 | 2825622  | psn    |          |          |        |
| -811.16  | 2595229  | psn    |          |          |        |
| -358.118 | 2563522  | psn    |          |          |        |
| -228.049 | 2491125  | psn    |          |          |        |
| -244.023 | 2471267  | psn    |          |          |        |
| -146.025 | 2384161  | psn    |          |          |        |
| -416.108 | 2370798  | psn    |          |          |        |
| -993.655 | 2345890  | psn    |          |          |        |
| -831.137 | 2325020  | psn    |          |          |        |
| -760.078 | 2294203  | psn    |          |          |        |
| -353.037 | 2244784  | psn    |          |          |        |
| -130.039 | 2227558  | psn    |          |          |        |
| -874.173 | 2207934  | psn    |          |          |        |
| -146.104 | 2033520  | psn    |          |          |        |
| -151.062 | 1948270  | psn    |          |          |        |
| -378.152 | 1836020  | psn    |          |          |        |
| -994.157 | 1833876  | psn    |          |          |        |
| -317.039 | 1619828  | psn    |          |          |        |
| -146.071 | 1601470  | psn    |          |          |        |
| -146.02  | 1589578  | psn    |          |          |        |
| -129.032 | 1572900  | psn    |          |          |        |
| -244.119 | 1561877  | psn    |          |          |        |
| -104.06  | 1533376  | psn    |          |          |        |
| -103.053 | 1487027  | psn    |          |          |        |
| -369.011 | 1482860  | psn    |          |          |        |
| -744.105 | 1443245  | psn    |          |          |        |
| -284.072 | 1440297  | psn    |          |          |        |
| -149.053 | 1427846  | psn    |          |          |        |
| -759.093 | 1331007  | psn    |          |          |        |
| -350.083 | 1323925  | psn    |          |          |        |
| -346.021 | 1306265  | psn    |          |          |        |
| -233.103 | 1248925  | psn    |          |          |        |

-436.095      1239505      psn  
 -397.988      1222801      psn

**SUPPLEMENT S3.      FEATURES FROM POSITIVE MODE INCLUDED IN THE COMPOSITE SPECTRUM**

| mz       | maxo     | source |          |         |     |          |         |     |          |          |     |
|----------|----------|--------|----------|---------|-----|----------|---------|-----|----------|----------|-----|
| 148.06   | 1.81E+09 | psp    | 170.0422 | 3883824 | psp | 465.3215 | 1884285 | psp | 173.0919 | 1058835  | psp |
| 130.0498 | 3.02E+08 | psp    | 424.2588 | 3865671 | psp | 463.306  | 1875812 | psp | 425.2428 | 1038059  | psp |
| 233.2447 | 2.6E+08  | psp    | 341.222  | 3865225 | psp | 230.1976 | 1848160 | psp | 196.1556 | 1034444  | psp |
| 664.1172 | 1.96E+08 | psp    | 481.3163 | 3849028 | psp | 318.2982 | 1844858 | psp | 380.0776 | 1032436  | psp |
| 233.113  | 1.22E+08 | psp    | 159.1603 | 3844951 | psp | 207.9982 | 1824690 | psp | 352.1902 | 1021926  | psp |
| 149.0633 | 91513336 | psp    | 240.172  | 3813592 | psp | 438.2743 | 1823870 | psp | 246.2419 | 1021253  | psp |
| 102.0548 | 61472984 | psp    | 243.2291 | 3693398 | psp | 308.1639 | 1808380 | psp | 393.2531 | 1016436  | psp |
| 123.0554 | 54190284 | psp    | 261.276  | 3614619 | psp | 205.6433 | 1763577 | psp | 192.0241 | 1013983  | psp |
| 665.1202 | 50223776 | psp    | 124.0587 | 3491213 | psp | 241.2133 | 1737384 | psp | 85.02834 | 1011348  | psp |
| 245.2447 | 48069948 | psp    | 226.1565 | 3441997 | psp | 150.0665 | 1731420 | psp | 253.2133 | 1004417  | psp |
| 190.2025 | 28252376 | psp    | 234.1538 | 3437938 | psp | 267.1369 | 1702268 | psp | 299.1636 | 1002699  | psp |
| 234.2479 | 26949514 | psp    | 235.1617 | 3252422 | psp | 359.1025 | 1688196 | psp | 368.1851 | 1000992  | psp |
| 271.0688 | 21521252 | psp    | 231.2293 | 3219105 | psp | 153.0405 | 1673078 | psp | 201.1903 | 991107.1 | psp |
| 276.2871 | 20748364 | psp    | 383.2324 | 3199432 | psp | 346.1889 | 1665952 | psp | 289.2712 | 978187   | psp |
| 427.306  | 19735338 | psp    | 702.0733 | 3124695 | psp | 483.2956 | 1661078 | psp | 350.1212 | 962097.6 | psp |
| 157.1447 | 18880884 | psp    | 171.0762 | 3102233 | psp | 117.1263 | 1638529 | psp | 327.2175 | 961277.2 | psp |
| 257.2446 | 18655262 | psp    | 248.1696 | 3073251 | psp | 369.2168 | 1625681 | psp | 234.1102 | 956079.1 | psp |
| 131.0531 | 17018116 | psp    | 226.0376 | 2991801 | psp | 142.1339 | 1621513 | psp | 305.696  | 948127.1 | psp |
| 350.102  | 15073590 | psp    | 283.132  | 2975036 | psp | 435.311  | 1610065 | psp | 260.6854 | 946392.5 | psp |
| 453.3216 | 15012519 | psp    | 116.1184 | 2972269 | psp | 228.1819 | 1591366 | psp | 442.1668 | 945906.9 | psp |
| 247.1287 | 14912596 | psp    | 493.3163 | 2965840 | psp | 232.1567 | 1547727 | psp | 323.215  | 943317.6 | psp |
| 150.0642 | 14645601 | psp    | 269.2447 | 2952662 | psp | 432.1362 | 1543830 | psp | 422.2795 | 942465.8 | psp |
| 227.1644 | 13957159 | psp    | 131.0338 | 2910072 | psp | 203.1866 | 1531236 | psp | 507.3319 | 936827.4 | psp |
| 191.1865 | 13730655 | psp    | 103.0582 | 2891140 | psp | 273.0669 | 1513754 | psp | 225.1486 | 928799.9 | psp |
| 234.1163 | 12932350 | psp    | 428.3099 | 2856149 | psp | 485.3112 | 1481398 | psp | 511.3267 | 928654.2 | psp |
| 265.0503 | 10756661 | psp    | 451.306  | 2814969 | psp | 285.2398 | 1461184 | psp | 191.1024 | 925484.1 | psp |
| 666.1227 | 10674766 | psp    | 477.3215 | 2653451 | psp | 222.1541 | 1426840 | psp | 996.1745 | 923613.8 | psp |
| 200.1869 | 10418991 | psp    | 175.1553 | 2644349 | psp | 132.1131 | 1426403 | psp | 319.3297 | 923008.4 | psp |
| 295.1138 | 10269037 | psp    | 686.0993 | 2641257 | psp | 667.1254 | 1425935 | psp | 412.2589 | 920321.3 | psp |
| 259.2604 | 8838102  | psp    | 277.2905 | 2631271 | psp | 241.1616 | 1415203 | psp | 675.1086 | 918688   | psp |
| 304.1618 | 8177553  | psp    | 450.2744 | 2600441 | psp | 440.2537 | 1412062 | psp | 289.2347 | 901264.7 | psp |
| 147.1604 | 7950535  | psp    | 229.2137 | 2572000 | psp | 223.9721 | 1405962 | psp | 497.3113 | 896755.7 | psp |
| 214.2025 | 7811584  | psp    | 234.2288 | 2559343 | psp | 304.2823 | 1398901 | psp | 176.0737 | 893954.2 | psp |
| 349.1181 | 7632175  | psp    | 426.2745 | 2514821 | psp | 296.1167 | 1398888 | psp | 1014.651 | 888278.3 | psp |
| 314.2092 | 7174908  | psp    | 379.2011 | 2492418 | psp | 271.224  | 1397299 | psp | 410.2432 | 887668.1 | psp |
| 434.2795 | 6942368  | psp    | 99.0916  | 2480767 | psp | 235.2513 | 1393120 | psp | 427.2585 | 883956.6 | psp |
| 255.0949 | 6566525  | psp    | 397.2115 | 2450742 | psp | 355.2012 | 1372936 | psp | 150.647  | 883463.1 | psp |
| 134.0447 | 6280206  | psp    | 136.0618 | 2449351 | psp | 408.2639 | 1360118 | psp | 454.2693 | 877597.7 | psp |
| 251.0346 | 6058636  | psp    | 191.2058 | 2432413 | psp | 158.1481 | 1357751 | psp | 495.2955 | 870804.2 | psp |
| 436.295  | 6045015  | psp    | 601.3956 | 2407377 | psp | 496.3636 | 1350771 | psp | 256.1209 | 866752.1 | psp |
| 104.1181 | 5943378  | psp    | 454.3255 | 2396598 | psp | 155.129  | 1348961 | psp | 489.3215 | 863220.1 | psp |
| 275.2555 | 5848210  | psp    | 210.1713 | 2380743 | psp | 285.0829 | 1342086 | psp | 273.276  | 862540.6 | psp |
| 469.3164 | 5828522  | psp    | 271.2604 | 2371772 | psp | 422.2432 | 1319220 | psp | 215.1024 | 861544.3 | psp |
| 261.2396 | 5793045  | psp    | 495.3319 | 2369524 | psp | 353.2219 | 1308334 | psp | 392.2689 | 854450.4 | psp |
| 467.3007 | 5786659  | psp    | 443.3009 | 2356544 | psp | 360.1324 | 1293417 | psp | 372.0838 | 849048   | psp |
| 234.242  | 5718033  | psp    | 365.2218 | 2339415 | psp | 287.2555 | 1280357 | psp | 396.2639 | 846665.8 | psp |
| 410.2795 | 5668431  | psp    | 323.0393 | 2321906 | psp | 335.7307 | 1272806 | psp | 267.0483 | 837923.8 | psp |
| 246.2481 | 5659415  | psp    | 411.2635 | 2312104 | psp | 163.1552 | 1251915 | psp | 398.2431 | 837573.2 | psp |
| 149.0573 | 5610463  | psp    | 233.1645 | 2304944 | psp | 333.0643 | 1236596 | psp | 703.077  | 835253.9 | psp |
| 202.2025 | 5554419  | psp    | 455.3009 | 2298684 | psp | 235.1172 | 1228381 | psp | 440.29   | 828606.9 | psp |
| 288.2871 | 5536289  | psp    | 326.1748 | 2271483 | psp | 192.19   | 1226547 | psp | 256.167  | 827247.1 | psp |
| 332.5624 | 5531230  | psp    | 218.1975 | 2269794 | psp | 227.1979 | 1225753 | psp | 120.613  | 826322.6 | psp |
| 255.229  | 5406180  | psp    | 258.2481 | 2242889 | psp | 129.1261 | 1218545 | psp | 151.0674 | 824307.5 | psp |
| 298.1796 | 5280998  | psp    | 479.337  | 2236099 | psp | 310.1796 | 1211365 | psp | 342.1219 | 822430.4 | psp |
| 354.1695 | 5181576  | psp    | 314.7111 | 2185420 | psp | 186.1713 | 1206633 | psp | 505.3164 | 815663.2 | psp |
| 269.1162 | 5132939  | psp    | 594.4002 | 2179335 | psp | 436.2588 | 1201589 | psp | 286.1317 | 798008.8 | psp |
| 374.148  | 5068381  | psp    | 388.1456 | 2168571 | psp | 143.1292 | 1200430 | psp | 556.3486 | 795780.7 | psp |
| 128.0707 | 5005582  | psp    | 217.6432 | 2141469 | psp | 228.2184 | 1197925 | psp | 460.295  | 794064.2 | psp |
| 385.2481 | 4837042  | psp    | 108.6127 | 2123574 | psp | 226.6486 | 1191097 | psp | 151.6549 | 793066.4 | psp |
| 384.2641 | 4743927  | psp    | 272.0722 | 2101159 | psp | 131.0469 | 1184284 | psp | 239.1977 | 791010.1 | psp |
| 85.04767 | 4690118  | psp    | 247.1618 | 2075201 | psp | 185.1761 | 1183860 | psp | 780.2363 | 789338.8 | psp |
| 218.6511 | 4430709  | psp    | 138.6471 | 2071239 | psp | 183.1604 | 1172474 | psp | 1006.664 | 781422.4 | psp |
| 439.306  | 4337509  | psp    | 388.0578 | 2069616 | psp | 483.332  | 1158942 | psp | 317.0835 | 781141.6 | psp |
| 320.1642 | 4316508  | psp    | 132.0541 | 2067111 | psp | 153.0768 | 1157504 | psp | 242.1696 | 780253.4 | psp |
| 186.0162 | 4303773  | psp    | 406.2483 | 2063521 | psp | 247.2239 | 1154023 | psp | 298.2719 | 780054.4 | psp |
| 322.1798 | 4289709  | psp    | 468.2848 | 2022243 | psp | 995.6728 | 1127385 | psp | 148.0006 | 779222.2 | psp |
| 452.29   | 4236093  | psp    | 351.1054 | 2003873 | psp | 285.0848 | 1110661 | psp | 406.1561 | 777100.1 | psp |
| 340.1903 | 4202912  | psp    | 509.3111 | 1973029 | psp | 448.2951 | 1108775 | psp | 542.0681 | 770435.9 | psp |



## SUPPLEMENT S4. BACKGROUND PEAKS FROM POSTIVE MODE

85.07597, 86.05996, 86.07934, 87.05958, 87.09155, 88.02144, 88.07563, 89.07086, 89.10725, 90.05492, 91.05417, 92.03683, 93.12071, 94.06508, 95.0603, 96.08069, 96.99513, 97.07597, 98.07123, 98.08307, 98.98, 99.05523, 99.09154, 100.07561, 100.08836, 100.09939, 100.11199, 101.05966, 101.07089, 101.079, 101.10728, 102.09128, 102.10251, 103.08651, 104.01614, 104.07051, 104.11812, 104.99225, 105.10219, 105.12099, 107.07019, 108.61268, 109.11416, 111.01075, 111.05527, 111.09161, 111.11676, 112.08948, 112.09863, 113.07085, 113.10723, 114.09157, 114.10279, 114.11087, 114.61299, 115.0212, 115.09201, 115.10702, 116.07081, 116.11841, 117.00044, 117.06609, 117.10243, 117.12156, 117.12624, 118.03207, 118.06534, 118.08644, 118.09768, 118.13401, 119.01608, 119.08167, 120.01113, 120.06568, 120.11322, 120.61293, 121.01186, 121.62073, 122.00814, 122.07141, 123.09179, 123.12619, 124.08704, 125.03632, 125.07104, 125.10743, 125.12361, 126.10266, 127.08668, 127.10709, 128.08193, 128.09011, 128.11828, 128.61031, 129.06721, 129.07548, 129.10231, 129.12098, 129.12615, 130.0863, 130.09756, 130.1339, 130.15906, 131.01594, 131.08153, 131.11858, 131.13906, 132.11315, 133.03156, 134.02723, 135.0108, 135.07242, 135.10157, 135.12607, 136.0118, 136.02156, 136.08691, 136.13386, 136.94014, 137.00786, 137.02641, 137.04574, 137.12346, 137.6393, 138.1025, 138.6471, 139.08654, 139.1229, 139.1485, 140.00183, 140.08176, 140.11816, 141.10215, 141.11338, 141.12131, 141.12599, 142.03375, 142.09748, 142.13386, 143.08149, 143.12002, 143.12912, 143.14067, 143.58723, 144.0475, 144.11311, 144.64713, 145.0315, 145.09713, 145.1178, 145.14376, 146.0268, 146.10048, 146.12877, 147.04714, 147.10153, 147.11277, 147.16038, 148.14423, 148.16268, 149.02329, 149.02641, 149.12245, 150.02785, 150.10252, 150.64706, 151.02325, 151.09657, 151.65489, 152.11815, 152.12807, 153.1134, 154.03181, 154.09741, 154.13378, 155.11813, 155.12903, 155.15419, 156.04746, 156.11312, 156.1495, 157.09714, 157.11936, 157.14472, 158.02675, 158.03935, 158.12874, 158.14175, 158.14875, 159.04713, 159.11274, 159.16035, 160.04238, 160.04885, 160.10796, 160.14435, 160.16328, 160.16815, 161.04393, 161.06277, 161.092, 161.176, 162.1236, 163.04201, 163.13277, 163.15523, 164.13632, 165.05087, 165.11229, 166.13327, 167.03699, 167.12907, 168.11308, 168.13219, 168.14949, 169.14469, 170.09636, 170.12872, 170.14839, 171.11272, 171.12396, 171.14912, 171.16031, 172.04236, 172.10797, 172.14434, 172.15241, 172.16302, 173.06283, 173.0808, 173.13967, 173.17604, 174.12368, 174.12769, 174.16006, 174.1794, 175.11884, 175.1553, 176.07364, 176.15865, 177.05769, 177.05941, 179.05017, 179.11939, 179.12908, 180.08658, 180.15934, 181.02837, 181.14467, 182.12883, 182.14002, 182.16519, 183.12404, 183.16042, 184.10809, 184.14445, 184.1572, 185.13968, 185.17607, 186.12371, 186.14282, 186.16008, 186.1713, 187.10771, 187.12666, 187.15532, 187.63268, 188.13934, 188.15886, 188.1757, 188.18692, 189.14256, 189.17097, 189.17909, 190.17403, 190.20248, 191.07326, 191.15016, 191.18648, 191.19955, 191.20588, 192.0729, 192.07663, 192.12287, 192.13817, 192.18369, 192.19, 192.63546, 193.07023, 193.07803, 193.14406, 194.08424, 194.14, 195.16039, 196.00386, 196.14419, 196.15638, 197.13006, 197.13962, 197.17604, 198.12368, 198.16005, 198.17127, 199.1553, 199.17315, 199.18045, 199.19166, 199.6326, 200.07372, 200.13934, 200.15872, 200.17577, 200.1869, 200.64022, 201.13444, 201.17093, 201.18341, 201.19028, 202.15464, 202.20253, 203.15027, 203.18662, 203.20595, 204.06863, 204.13407, 204.17066, 204.18185, 204.18999, 204.63545, 205.16596, 205.18971, 205.64328, 206.14122, 206.1975, 207.18149, 207.20089, 208.09998, 208.15572, 209.13001, 209.1396, 209.15261, 209.17605, 210.13803, 210.17129, 210.63581, 211.15529, 211.17424, 211.1916, 211.64323, 212.0948, 212.13945, 212.15023, 212.1869, 212.63283, 213.07879, 213.09428, 213.09817, 213.13451, 213.14873, 213.15972, 213.17084, 213.17876, 213.19025, 213.6406, 214.09161, 214.09928, 214.1565, 214.16874, 214.20251, 214.65799, 215.15217, 215.15837, 215.18661, 215.19963, 215.20594, 216.1427, 216.17067, 216.18184, 216.21823, 216.63547, 217.05013, 217.10706, 217.16596, 217.17918, 217.20226, 217.22087, 217.64327, 218.08436, 218.1396, 218.14574, 218.15914, 218.19751, 218.23386, 218.65107, 219.15206, 219.18127, 219.2009, 219.64064, 219.65049, 220.15656, 220.65807, 221.14953, 222.15401, 222.17124, 222.19245, 222.65578, 223.09661, 223.16716, 223.6432, 224.18692, 224.63293, 224.65101, 225.11225, 225.14906, 225.17085, 225.18178, 225.64072, 225.65032, 226.11058, 226.15659, 226.16604, 226.20263, 226.64862, 226.65824, 227.09452, 227.11292, 227.15022, 227.16439, 227.18729, 227.1979, 227.20615, 227.65944, 227.66625, 228.15422, 228.16232, 228.16944, 228.18196, 228.21841, 228.23212, 228.65962, 229.16609, 229.18622, 229.20254, 229.21365, 230.10557, 230.15002, 230.19766, 230.21678, 230.65119, 231.1491, 231.18175, 231.20077, 231.22928, 231.65925, 232.15681, 232.2133, 232.23184, 232.65825, 233.02438, 233.14719, 233.16457, 233.1987, 233.24464, 233.65661, 233.66631, 234.13359, 234.15387, 234.19217, 234.22883, 234.24205, 234.24782, 234.64771, 234.65561, 234.66968, 235.06063, 235.1516, 235.16193, 235.16631, 235.25076, 235.66326, 235.67739, 236.06246, 236.161, 236.16874, 236.17908, 236.18658, 237.02412, 237.05862, 237.1484, 237.18179, 238.11043, 238.15628, 238.20249, 238.6484, 238.65809, 239.16419, 239.18626, 239.19773, 239.6572, 239.66609, 240.08975, 240.12591, 240.15383, 240.16149, 240.17197, 240.18179, 240.21804, 240.61737, 240.65967, 240.67344, 241.16165, 241.16814, 241.17952, 241.21326, 241.22154, 241.66313, 241.67752, 242.1515, 242.16956, 242.19738, 242.21646, 242.23385, 242.66819, 243.15933, 243.18127, 243.19275, 243.20078, 243.2291, 244.12101, 244.15676, 244.17684, 244.21309, 244.23191, 245.12302, 245.16367, 245.1972, 245.20831, 245.24465, 246.07904, 246.15394, 246.1722, 246.19239, 246.22886, 246.24187, 246.24802, 246.65695, 246.67097, 247.16184, 247.17743, 247.21256, 247.2239, 247.2497, 247.26028, 247.66341, 247.67756, 248.15147, 248.1696, 248.17926, 248.208, 248.23172, 248.67112, 248.68535, 249.07634, 249.15932, 249.18051, 249.18775, 249.2395, 250.07828, 250.24198, 251.03464, 251.07009, 251.17476, 251.19762, 252.03428, 252.03791, 252.17217, 252.18178, 252.21818, 252.67116, 253.03279, 253.12126, 253.16164, 253.17849, 253.21334, 253.62562, 253.67786, 254.10541, 254.15149, 254.16949, 254.19757, 254.21688, 254.23396, 254.66789, 254.68532, 255.13691, 255.1592, 255.178, 255.18947, 255.2754, 255.66094, 255.67412, 256.12099, 256.139, 256.16712, 256.17692, 256.21303, 256.23087, 256.6827, 257.1337, 257.17442, 257.18369, 257.19763, 257.20824, 257.21646, 257.24454, 258.15903, 258.19237, 258.22875, 258.2421, 258.24801, 259.16665, 259.22411, 259.26029, 259.67765, 260.16949, 260.20795, 260.23153, 260.26289, 260.68543, 261.17771, 261.18764, 261.23959, 261.27593, 261.67401, 261.69311, 262.16712, 262.24226, 262.27937, 262.66465, 262.68286, 263.10568, 263.15769, 263.17417, 263.21891, 263.67206, 264.16438, 264.18269, 264.22663, 264.6814, 265.05028, 265.12126, 265.21334, 265.23449, 266.05218, 266.15301, 266.6855, 267.0489, 267.13697, 267.22803, 268.18746, 268.21301, 268.23164, 268.68285, 269.05054, 269.11622, 269.18161, 269.19864, 269.20832, 269.24466, 269.6907, 270.10021, 270.11834, 270.18269, 270.19228, 270.20799, 270.22869, 270.24805, 271.13185, 271.16881, 271.20036, 271.22372, 271.26031, 272.18013, 272.208, 272.22993, 272.26132, 273.19008, 273.23956, 273.27596, 274.22367, 274.24223, 274.27119, 275.10568, 275.25545, 275.27423, 275.29182, 275.69085, 276.19087, 276.25893, 276.28701, 276.68058, 277.12175, 277.17784, 277.19065, 277.19658, 277.23478, 277.2711, 277.28455, 277.29038, 277.68872, 278.04575, 278.0763, 278.29251, 279.13714, 279.15919, 279.18826, 279.2293, 279.6801, 280.13942, 280.18132, 281.13399, 281.15278, 281.20842, 282.1004, 282.1522, 282.15616, 282.22891, 283.13207, 283.14966, 283.2238, 283.26055, 284.13545, 284.20813, 284.2603, 285.1892, 285.23981, 285.27617, 286.13173, 286.19616, 286.22381, 286.24295, 286.27138, 287.21911, 287.25545, 288.19299, 288.20311, 288.23948, 288.25883, 288.28703, 289.23469, 289.27108, 289.29033, 290.07215, 290.23877, 290.26774, 291.25037, 291.27357, 292.19599, 292.2819, 292.68804, 293.1165, 293.18868, 293.28532, 293.66857, 295.13235, 295.22421, 295.26085, 296.11647, 296.1319, 296.13571, 296.16399, 297.14801, 297.23985, 297.27643, 298.15044, 298.17961, 298.22406, 298.24315, 298.27011, 299.16372, 299.18176, 299.25581, 300.17708, 300.19364, 300.25913, 300.2873, 300.6861, 301.2015, 301.27133, 301.29058, 301.69359, 301.70335, 302.18203, 302.20197, 302.26839, 302.30293, 302.67416, 303.25057, 303.30628, 304.25034, 304.2822, 304.31861, 304.68828, 305.66894, 305.69622, 306.14833, 306.19876, 306.67689, 306.68611, 307.16889, 307.20153, 307.24562, 307.28186, 307.70341, 308.09127, 308.16379, 308.18148, 308.19084, 309.14789, 309.16736, 309.1989, 309.70074, 310.17951, 310.20666, 310.70853, 311.16358, 311.18733, 311.25577, 312.15867, 312.19332, 312.28727, 313.14302, 313.20142, 313.2713, 313.69346, 313.70296, 314.17439, 314.18194, 314.2092, 314.26678, 314.30291, 314.67399, 314.70108, 314.71105, 315.19019, 315.19959, 315.21086, 315.25084, 315.68219, 315.69183, 316.18951, 316.20709, 316.25407, 316.28247, 317.19663, 317.26647, 317.31416, 318.14863, 318.20389, 318.29814, 319.20172, 319.23441, 319.28218, 319.32977, 320.05693, 320.16417, 320.2096, 320.21849, 321.14835, 321.16778, 321.19018, 321.19918, 321.25022, 321.6912, 321.70101, 322.16119, 322.17983, 322.20698, 322.70887, 322.72279, 323.16393, 323.18237, 323.18767, 323.2142, 323.22119, 323.67975, 323.71705, 324.15917, 324.19546, 324.69705, 325.14315, 325.17973, 325.1945, 325.19885, 326.17475, 326.20948, 326.30326, 327.00869, 327.17815, 327.19026, 327.21742, 327.71923, 328.19805, 328.20704, 328.28252, 328.69965, 328.72269, 329.00663, 329.18776, 329.19673, 329.21426, 330.20296, 330.29815, 330.72025, 331.00281, 331.21213, 331.24577, 331.28213, 331.32975, 332.16414, 332.19279, 332.27733, 333.08845, 333.2978, 333.309, 334.07234, 334.1798, 334.20708, 334.72284, 335.09852, 335.18775, 335.32462, 335.71669, 335.73065, 336.1591, 336.19703, 336.23243, 337.18957, 337.20292, 337.21229, 338.17472, 338.22004, 339.15872, 339.17831, 339.20624, 340.15386, 340.17151, 340.19029, 341.19309, 341.22192, 342.20607,

342.22592, 342.29807, 342.72012, 343.02814, 343.21227, 343.72801, 344.19293, 344.22943, 344.24364, 344.73619, 345.20032, 345.25045, 345.34531, 346.17987, 346.18881, 347.19201, 348.19553, 348.73844, 349.0833, 349.18939, 350.17466, 350.211, 350.32421, 351.20642, 351.22876, 351.72668, 352.19029, 352.20907, 353.22188, 354.16954, 355.17206, 355.20119, 356.18535, 357.21686, 357.25161, 360.23312, 361.19064, 363.20625, 363.26064, 363.30825, 364.19033, 364.20989, 364.29225, 365.203, 365.22181, 366.20627, 366.23014, 366.72957, 367.12423, 367.20101, 367.23746, 368.22159, 368.24103, 369.21678, 373.24082, 373.25648, 373.74263, 375.20629, 375.23839, 375.30818, 377.2218, 379.20112, 379.2384, 379.73293, 381.21674, 381.23821, 382.2008, 382.22053, 382.24831, 383.23237, 384.23631, 384.26402, 385.24804, 385.26783, 386.18444, 386.2518, 387.18835, 387.24164, 388.1457, 388.24618, 388.74791, 389.14928, 389.22694, 389.24916, 389.72823, 390.20586, 391.20105, 391.23749, 391.28463, 392.23269, 392.24087, 392.28794, 393.21673, 393.25309, 394.24766, 395.19604, 395.23213, 396.22764, 396.24207, 396.26389, 397.21157, 397.24791, 397.75289, 398.23216, 398.24313, 399.2273, 400.25888, 401.24325, 401.25386, 401.75569, 402.23447, 402.73608, 404.23273, 405.21667, 405.31864, 406.15618, 406.24828, 407.23231, 407.25198, 407.3343, 408.23749, 408.2639, 409.2115, 409.24766, 409.26746, 409.76712, 410.23236, 410.2432, 410.25131, 410.25929, 410.27954, 411.22731, 411.2398, 411.26359, 411.28318, 411.74113, 412.25884, 412.26691, 412.27764, 413.24277, 413.26161, 418.24827, 419.2319, 419.33428, 420.22767, 420.26391, 421.21161, 421.24809, 421.2676, 422.24322, 422.27955, 423.22728, 423.24676, 423.26356, 423.27829, 424.25881, 425.24284, 425.2628, 425.29049, 426.24728, 426.27447, 427.2585, 427.27851, 427.30596, 428.29021, 428.30985, 429.22642, 429.30278, 429.31082, 430.23021, 431.18772, 432.26379, 433.24782, 433.26747, 434.243, 434.2794, 435.28324, 436.25882, 436.27694, 437.24273, 437.2793, 437.29881, 438.23799, 438.27432, 438.2918, 438.31071, 439.22204, 439.25847, 439.27804, 439.30598, 440.25366, 440.28999, 440.30989, 441.23763, 441.27397, 441.28809, 442.2692, 442.2931, 443.30094, 444.26372, 446.27942, 447.27787, 448.25868, 449.26204, 449.29015, 449.29839, 450.27437, 450.29362, 451.27811, 451.30594, 452.25366, 452.28996, 452.30965, 453.29065, 453.32153, 454.26929, 454.28784, 454.306, 454.32544, 455.24204, 455.30091, 455.31787, 455.32696, 455.33688, 456.30446, 456.32158, 457.20331, 458.2793, 459.27452, 459.29583, 460.25853, 461.29022, 461.29846, 462.14658, 462.27433, 462.29332, 462.31062, 463.26962, 463.30604, 464.25352, 464.28986, 464.30948, 465.2855, 465.32144, 466.26917, 466.28819, 466.30552, 467.30071, 468.30445, 468.3323, 469.2982, 469.31632, 470.32027, 470.34799, 471.29586, 471.31291, 471.32169, 471.3514, 472.26841, 473.2527, 473.29007, 474.2297, 474.27361, 474.31057, 475.2137, 475.2694, 475.2908, 475.30566, 475.7919, 476.27121, 476.28973, 476.309, 476.32616, 477.32141, 478.26913, 478.30556, 479.3007, 479.33703, 480.22821, 480.32115, 480.34088, 481.27995, 481.31629, 481.35256, 482.26392, 482.30048, 482.3202, 482.34784, 483.29564, 483.33191, 484.27959, 484.29799, 484.31619, 484.3358, 485.27629, 485.3112, 486.34274, 487.30603, 488.20891, 489.3214, 491.30058, 491.33696, 492.30386, 492.33185, 493.28016, 493.31629, 494.30048, 494.32014, 494.34787, 495.29589, 495.3319, 496.29817, 496.31614, 496.3359, 496.36353, 497.31127, 497.34764, 497.36724, 498.2841, 498.34273, 499.28905, 499.32682, 501.32141, 501.34254, 503.30054, 503.33694, 505.28239, 505.31629, 505.35266, 506.2437, 507.29554, 507.3318, 508.31601, 508.32754, 508.36339, 509.31109, 509.34742, 510.34264, 511.32669, 512.25818, 512.33022, 512.35825, 513.34237, 514.27939, 515.31041, 516.24001, 517.31606, 519.33175, 520.36342, 521.31104, 521.34741, 522.34262, 522.37908, 523.29034, 523.32663, 524.35818, 525.30601, 525.34231, 526.33748, 527.32162, 527.35798, 531.29806, 534.3424, 535.32666, 536.35808, 537.34231, 538.37389, 539.35803, 541.3261, 541.3372, 547.29117, 551.32165, 552.35308, 557.26712, 557.36905, 558.35315, 559.33731, 559.3563, 561.2985, 569.36916, 584.33241, 584.3689, 585.37255, 586.33019, 598.34821, 599.37975, 600.30936, 600.36385, 601.39536, 602.39869, 603.35673, 608.36893, 610.33068, 613.39597, 614.39928, 617.39086, 619.40672, 623.37891, 625.39606, 626.38008, 627.41167, 628.34136, 629.37316, 629.39054, 639.41166, 641.3909, 643.35214, 643.40674, 644.4098, 644.43824, 645.36803, 645.42242, 653.42756, 655.40663, 659.40167, 669.42247, 670.4539, 671.38357, 776.48833, 777.44678, 801.50109, 125.09311, 132.10192, 146.08126, 203.62768, 228.08982, 232.64885, 238.16619, 241.14351, 251.1615, 255.67603, 262.1905, 267.69313, 268.08485, 275.67271, 276.6987, 280.17136, 299.21931, 326.19219, 329.17434, 329.71163, 330.15849, 336.72069, 344.22006, 353.19859, 354.20606, 356.73598, 370.22028, 383.21353, 384.21719, 389.22104, 394.20079, 435.26357, 446.24197, 447.237, 459.28054, 460.29332, 468.28477, 469.28837, 470.30066, 473.27211, 480.30437, 488.26101, 488.29839, 501.30612, 506.31955, 516.31375, 539.3216, 553.33726, 194.11754, 210.13356, 285.14773, 294.14819, 307.13258, 320.71048, 321.16349, 327.25083, 437.26234, 455.27324, 602.37937, 336.22246, 449.19828, 283.1687, 350.12131,

## SUPPLEMENT S5. BACKGROUND PEAKS FROM NEGATIVE MODE

-86.02469, -87.00343, -87.00867, -87.04507, -88.01205, -88.04032, -89.02437, -90.01876, -90.02772, -91.05041, -92.03252, -93.0345, -94.02978, -94.98056, -95.02504, -95.98015, -96.9764, -97.1843, -98.0247, -99.00797, -99.01997, -100.04037, -101.00628, -101.02429, -101.06069, -102.02006, -103.03999, -105.01917, -108.04543, -109.02929, -109.04053, -110.03587, -111.01982, -112.04024, -112.98545, -113.02427, -113.03553, -113.98874, -114.01943, -114.05585, -115.03989, -115.05112, -115.07627, -116.03591, -116.07154, -116.07965, -116.92839, -117.00118, -117.01918, -117.05557, -118.05084, -119.0168, -119.03478, -120.0179, -121.01363, -121.02934, -122.02458, -122.03272, -123.01176, -125.03549, -127.00114, -129.05563, -129.092, -130.08719, -130.99242, -131.03483, -131.07123, -132.01212, -132.99615, -133.01221, -133.05136, -134.02951, -134.0471, -134.97547, -135.02998, -136.93661, -136.99104, -137.02751, -137.03553, -138.01956, -139.04313, -140.9861, -141.01683, -141.06691, -141.09202, -142.02012, -142.05082, -142.97531, -143.02082, -143.03483, -143.04608, -143.07124, -143.10763, -144.03011, -144.11102, -144.99172, -145.05053, -145.06175, -145.08693, -145.09814, -146.02087, -146.0264, -148.9524, -149.0494, -151.04001, -152.03532, -154.06219, -154.94736, -155.00166, -155.10771, -155.94691, -156.00217, -156.94384, -156.95105, -156.99069, -156.99769, -157.00577, -157.03231, -157.06157, -157.08685, -157.1232, -157.99403, -158.04569, -158.09299, -158.1266, -158.98943, -159.07732, -159.10249, -159.99224, -160.04107, -161.02743, -161.04546, -163.06114, -165.02228, -165.04029, -165.979, -169.08703, -171.07752, -171.10274, -171.13907, -172.14253, -172.95785, -173.95753, -174.05915, -174.9543, -174.95981, -174.96711, -175.00939, -175.01731, -175.04301, -175.06107, -175.07071, -175.07691, -175.11895, -176.04273, -176.04619, -176.05593, -177.02231, -177.03986, -177.0474, -178.04317, -178.04919, -178.98346, -179.038, -179.05593, -180.0395, -180.05927, -180.9893, -180.99922, -181.07165, -183.03289, -185.05668, -185.07729, -185.09301, -185.11815, -185.1546, -187.04309, -187.0975, -188.03835, -189.02245, -189.05875, -189.08799, -190.01796, -190.05406, -192.03341, -192.06975, -193.0536, -193.0713, -194.05329, -194.05698, -194.06678, -194.08211, -194.98854, -195.03294, -195.05075, -195.05819, -196.99423, -197.01137, -197.04857, -197.99386, -199.13395, -199.1703, -200.17371, -201.02549, -202.05413, -203.05369, -203.05753, -204.03309, -204.05087, -205.05372, -205.15971, -206.05013, -206.0571, -207.03308, -207.0512, -207.06926, -208.0543, -208.06469, -208.07119, -208.93454, -209.06727, -209.07609, -210.04381, -210.06975, -210.9733, -211.06427, -211.13386, -212.06385, -212.06763, -213.06115, -213.186, -215.0328, -215.06739, -216.06963, -217.00295, -217.02977, -217.1013, -218.08584, -218.11449, -218.96332, -219.04441, -219.17532, -220.06463, -221.03029, -221.06356, -221.06777, -222.06144, -223.01999, -223.0643, -223.0823, -225.01701, -225.04366, -225.08002, -226.08247, -227.20173, -229.0304, -230.98613, -231.97848, -232.06469, -232.9247, -232.97913, -233.09839, -233.15469, -233.92427, -233.97953, -234.08034, -234.15807, -234.92133, -234.97716, -235.03943, -235.0644, -235.07781, -235.11199, -235.95363, -236.05968, -236.09602, -237.06157, -238.07533, -238.09329, -238.99375, -239.05944, -239.07732, -240.0807, -241.02088, -241.21743, -242.0519, -243.08058, -244.9855, -245.09639, -247.04109, -247.17036, -248.04282, -248.09606, -249.03817, -249.08015, -249.09137, -249.14974, -250.07565, -251.10697, -253.02069, -253.21744, -254.02174, -254.07427, -254.07842, -254.22083, -254.9612, -254.96809, -255.01766, -255.07209, -255.23308, -256.04958, -256.23648, -256.96118, -257.01576, -257.04655, -257.07002, -257.23982, -258.0717, -259.11186, -260.97409, -261.05594, -261.12776, -262.07538, -262.13042, -263.05382, -263.07809, -263.10705, -264.10945, -264.16072, -265.08649, -265.14807, -266.07057, -266.10669, -266.15146, -267.07243, -267.09078, -267.23316, -267.94553, -268.06653, -268.08679, -268.23652, -269.21248, -269.24885, -270.04732, -270.1017, -270.93524, -271.03145, -271.08563, -271.10453, -271.28679, -272.08778, -273.02044, -273.08129, -273.08973, -274.05255, -274.0602, -274.0872, -275.062, -275.10727, -276.04892, -276.05874, -276.09093, -276.10941, -277.05697, -277.12257, -277.18095, -278.15424, -279.13834, -280.08596, -280.98312, -281.06996, -281.11765, -281.24872, -282.06701, -282.25215, -283.2644, -284.08087, -284.26774, -285.047, -285.10121, -286.04808, -286.10335, -287.04319, -287.09973, -287.22015, -288.07586, -289.0781, -289.08631, -289.12237, -290.05224, -291.10201, -291.13837, -292.10163, -292.10538, -292.89169, -293.11773, -293.17765, -294.14929, -294.18017, -294.98231, -295.06749, -295.09927, -295.13312, -296.08079, -297.24355, -298.09645, -299.08043, -300.0826, -300.1386, -301.07062, -301.0961, -302.07329, -302.09839, -303.02103, -304.07074, -304.16995, -305.11795, -306.07672, -306.14923, -307.24649, -308.06295, -309.04698, -309.08325, -309.11255, -310.09946, -310.90227, -311.12828, -311.16887, -311.90183, -312.11231, -312.98764, -313.04196, -313.0963, -313.14389, -314.0987, -314.928, -315.08899, -315.1119, -315.25413, -316.10925, -317.09203, -318.14913, -319.13087, -320.09226, -321.09565, -321.11248, -321.19645, -323.24134, -325.01848, -325.05738, -325.18445, -326.09143, -327.12312, -329.23355, -330.90194, -330.95627, -330.9981, -331.08171, -331.99836, -333.2622, -334.14424, -335.12832, -335.14774, -336.15997, -337.14398, -337.19158, -339.03404, -339.07288, -339.12296, -339.15934, -340.10699, -340.16263, -341.11007, -341.13863, -342.12266, -343.08126, -344.11321, -344.97917, -345.01363, -345.06802, -345.08916, -347.21215, -347.24136, -348.15986, -349.06296, -349.10739, -349.19145, -349.25703, -350.10989, -350.28868, -351.09376, -351.12309, -352.03752, -352.08199, -352.15473, -353.08961, -353.13878, -354.12278, -354.14212, -355.15443, -356.11337, -356.18609, -358.12899, -361.01066, -361.1916, -363.0788, -363.20726, -364.2389, -365.10937, -365.13865, -365.2226, -365.28819, -366.05303, -366.15903, -367.11801, -367.15427, -368.10189, -368.12021, -368.91205, -369.06256, -369.10447, -369.13355, -370.12876, -370.86888, -372.10812, -373.11142, -374.12378, -376.16619, -377.18648, -378.1704, -379.20204, -380.18607, -381.13375, -381.21771, -382.20174, -383.12017, -383.14937, -383.2334, -384.16984, -384.18108, -385.17951, -386.12395, -386.13115, -387.15579, -388.13152, -390.25458, -391.23858, -392.2334, -393.1523, -394.97591, -395.19685, -396.18086, -397.12857, -398.19652, -399.15547, -399.22816, -400.13929, -401.17105, -404.23363, -405.12561, -406.24931, -407.28095, -408.87925, -409.20138, -410.1967, -411.0074, -411.16263, -412.01076, -412.17595, -414.25445, -415.15063, -416.27024, -418.24949, -419.14138, -419.28114, -420.22878, -421.21262, -422.2444, -423.22844, -423.27605, -424.17609, -424.2601, -425.24413, -425.29172, -426.19177, -426.24761, -427.21183, -427.22302, -429.16902, -433.29656, -434.30039, -435.27589, -437.20749, -438.23916, -439.22315, -440.17078, -441.23883, -441.28643, -442.19777, -442.27047, -443.25448, -444.19098, -445.29664, -446.15226, -446.22906, -447.13629, -447.27601, -448.26002, -449.12792, -449.29164, -450.32321, -451.25969, -451.30724, -453.23898, -453.28656, -454.27065, -455.21828, -457.2815, -458.19278, -459.31254, -461.15203, -461.29174, -461.31234, -463.27133, -463.30744, -465.23864, -465.28629, -466.27032, -467.25432, -467.30207, -468.12112, -468.2496, -468.28597, -469.2336, -469.27009, -469.28982, -471.26045, -475.30713, -476.33871, -477.28648, -478.27046, -479.30208, -480.24969, -480.28613, -481.28133, -481.318, -482.26539, -483.29698, -484.28104, -485.23973, -485.31263, -486.31657, -487.23317, -487.30891, -488.28718, -489.29062, -491.30228, -492.28619, -493.28981, -493.31789, -494.26564, -494.30184, -495.2607, -495.3059, -496.2811, -497.27721, -497.31273, -498.2604, -498.2793, -498.31662, -499.29203, -499.32839, -501.30769, -502.31151, -506.30158, -507.29669, -508.28085, -509.31246, -510.29652, -511.32797, -512.27599, -512.33185, -513.27078, -513.30734, -513.33215, -514.30247, -516.28166, -517.30229, -520.31728, -521.3124, -522.29656, -523.29116, -523.32816, -524.27597, -524.31243, -525.30737, -525.34382, -526.29153, -526.31155, -527.32307, -528.28181, -528.32704, -529.26652, -529.30199, -529.35814, -530.29732, -533.31242, -535.32825, -537.30753, -537.34393, -538.29166, -538.32805, -538.34774, -539.28608, -539.32317, -540.31819, -540.32756, -541.30242, -541.33875, -542.29721, -543.31812, -544.34962, -549.3075, -551.32329, -553.30243, -553.33896, -554.34209, -554.37026, -555.31794, -555.37388, -556.31253, -556.33844, -565.30083, -565.33867, -567.31776, -568.34924, -569.33378, -571.34938, -580.38617, -581.3338, -581.37019, -599.38092, -601.34236, -607.38605, -611.38059, -615.37571, -617.39142, -625.39646, -627.35787, -641.39147, -642.42304, -643.40719, -659.40216, -662.37677, -671.4022, -675.39678, -685.41758, -686.42072, -687.37903, -688.39221, -701.4125, -773.4698, -775.43115, -102.04053, -201.11324, -209.98953, -226.047, -231.08067, -292.94611, -293.89124, -312.89892, -351.221, -357.09883, -499.25605, -554.29749, -252.09103, -310.95664



SUPPLEMENT S6.  
EXTRACT

COMPOSITE SPECTRUM FROM 21-22 MINUTES OF A HILIC ANALYSIS OF E. COLI

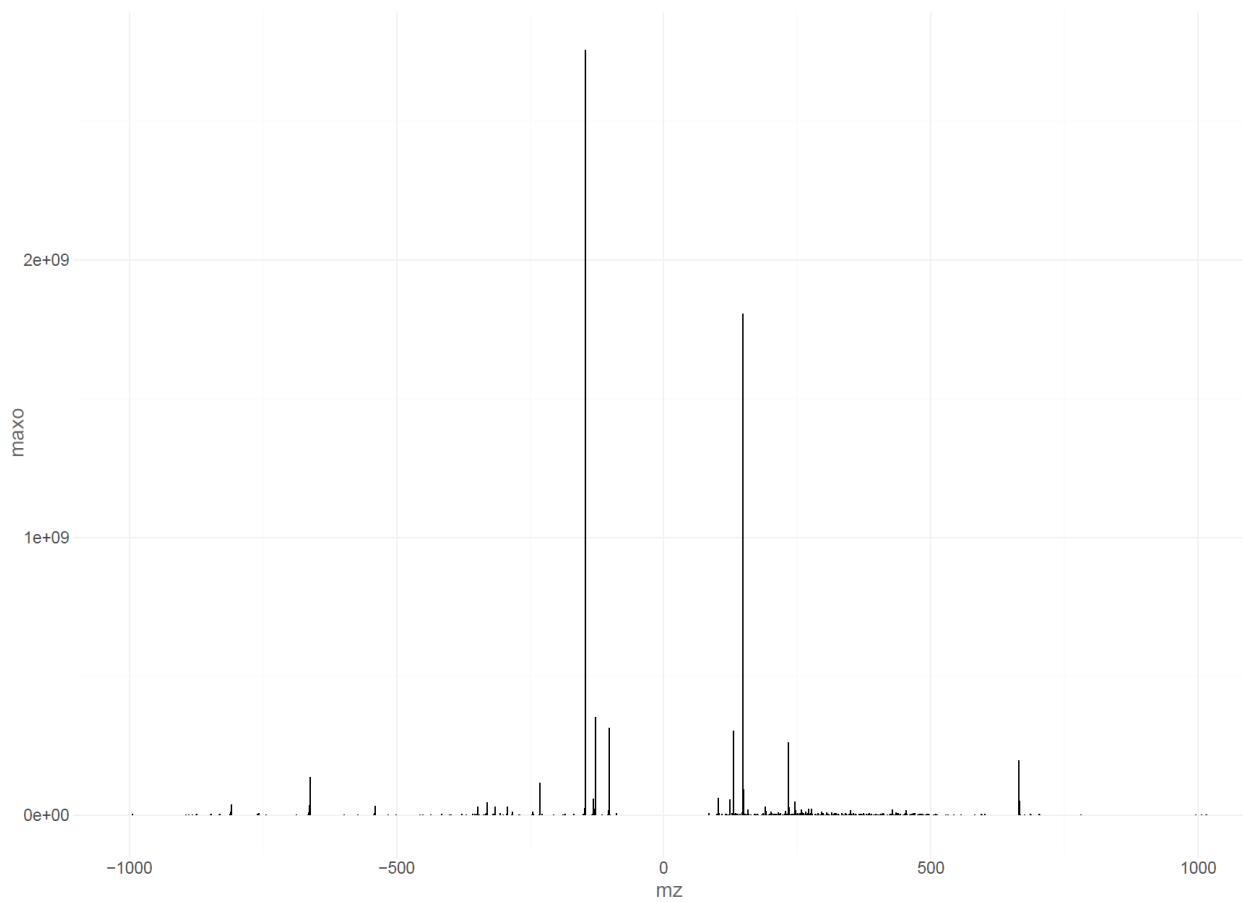

**SUPPLEMENT S7. LIST OF GRANULAR FORMULA USED****7.1 Isotopes: M.iso**

|         | <b>m</b> | <b>z</b> | <b>d</b> |
|---------|----------|----------|----------|
| C12-13  | 1.003355 | 0        | 1        |
| N14-15  | 0.997035 | 0        | 1        |
| O16-18  | 2.004245 | 0        | 1        |
| S32-33  | 0.999387 | 0        | 1        |
| S32-34  | 1.995796 | 0        | 1        |
| Cl35-37 | 1.99705  | 0        | 1        |
| Br79-81 | 1.997953 | 0        | 1        |
| Si28-29 | 0.999568 | 0        | 1        |
| Si28-30 | 1.996843 | 0        | 1        |
| K41-39  | 1.998119 | 0        | 1        |

**7.2 Charge Carriers: M.z**

|     | <b>z</b> | <b>m</b> | <b>d</b> |
|-----|----------|----------|----------|
| H+  | 1        | 1.007825 | 0        |
| Na+ | 1        | 22.98977 | 0        |
| K+  | 1        | 38.96371 | 0        |
| Cl- | -1       | 34.96885 | 0        |
| Br- | -1       | 78.91834 | 0        |

**7.3 Neutral Formula: M.n**

|          | <b>z</b> | <b>m</b> | <b>d</b> |
|----------|----------|----------|----------|
| -H2O     | 0        | -18.0106 | 1        |
| -CO2     | 0        | -43.9898 | 1        |
| -NH3     | 0        | -17.0265 | 1        |
| +HCOOH   | 0        | 46.00548 | 1        |
| +CH3COOH | 0        | 60.02113 | 1        |
| +CF3COOH | 0        | 113.9929 | 1        |
| +CH3CN   | 0        | 41.02655 | 1        |
| +CH3OH   | 0        | 32.02622 | 1        |
| -CO      | 0        | -27.9949 | 1        |
| +H3PO4   | 0        | 97.9769  | 1        |
| +SiO3H2  | 0        | 77.97732 | 1        |
| +SiO4H4  | 0        | 95.98789 | 1        |
| +SiC2H6O | 0        | 74.01879 | 1        |

## SUPPLEMENT S8. MZ.UNITY PARAMETERS USED FOR ANNOTATION OF THE COMPOSITE SPECTRUM

The code used to annotate this spectrum can be found online in the repository referenced in the main text. A summary of the annotation workflow is listed here.

### 8.1 Find peaks with isotope support for higher charge states

All peaks in the spectrum were searched with proposal charge  $z = 2 * \text{sign}(m/z)$  and mass  $m = \text{abs}(m/z) * 2$ . Any isotopes found support the higher charge state assignment. Search was performed on peaks of both polarities.

- $M = M.\text{iso}$ ,  $\text{ppm} = 1$ ,  $\text{BM.limits} = \text{cbind}(M.\text{min} = c(1), M.\text{max} = c(1), B.n = c(1))$

### 8.2 Find peaks with isotope support for charge state $z = 1$

All peaks in the spectrum were searched with proposal charge  $z = 1 * \text{sign}(m/z)$  and mass  $m = \text{abs}(m/z) * 2$ . Any isotopes found support the higher charge state. Search was performed on peaks of both polarities.

- $M = M.\text{iso}$ ,  $\text{ppm} = 1$ ,  $\text{BM.limits} = \text{cbind}(M.\text{min} = c(1), M.\text{max} = c(1), B.n = c(1))$

### 8.3 Annotate simple relationships

Peaks with a isotope support for charge state 2 were included along with all peaks for charge state 1. Search was performed on peaks of both polarities.

- Cross Polarity:  $M = M.z$ ,  $\text{ppm} = 10$ ,  $\text{BM.limits} = \text{cbind}(M.\text{min} = c(2), M.\text{max} = c(2), B.n = c(1))$
- Single Charge Carriers:  $M = M.z$ ,  $\text{ppm} = 2$ ,  $\text{BM.limits} = \text{cbind}(M.\text{min} = c(1), M.\text{max} = c(1), B.n = c(1))$
- Neutral losses and adducts:  $M = M.n$ ,  $\text{ppm} = 2$ ,  $\text{BM.limits} = \text{cbind}(M.\text{min} = c(1), M.\text{max} = c(1), B.n = c(1))$

### 8.4 Annotate analyte-analyte mers and distal fragments

Peaks with a isotope support for charge state 2 were included along with all peaks for charge state 1. Search was performed sequentially first for negative and then for positive mode.

- $M = M.z$  (only  $H^+$ ),  $\text{ppm} = 2$ ,  $\text{BM.limits} = \text{cbind}(M.\text{min} = c(1), M.\text{max} = c(1), B.n = c(2))$

### 8.5 Annotate analyte-analyte mers and distal fragments across polarities

Peaks with a isotope support for charge state 2 were included along with all peaks for charge state 1. Search was performed on peaks of both polarities.

- $M = M.z$  (only  $H^+$ ),  $\text{ppm} = 2$ ,  $\text{BM.limits} = \text{cbind}(M.\text{min} = c(1), M.\text{max} = c(1), B.n = c(2))$

### 8.6 Annotate background mers

Peaks with a isotope support for charge state 2 were included along with all peaks for charge state 1. Features and mers were included in this search.

- $M = M.z$  (only  $H^+$ ),  $\text{ppm} = 2$ ,  $\text{BM.limits} = \text{cbind}(M.\text{min} = c(1), M.\text{max} = c(1), B.n = c(2))$

## SUPPLEMENT S9. FRAGMENTATION SPECTRUM OF NAD

Spectra taken at collision energies 0, 10, 20, 40, 60, 90, and 120 were averaged from both positive and negative mode. The composite spectrum is shown below.

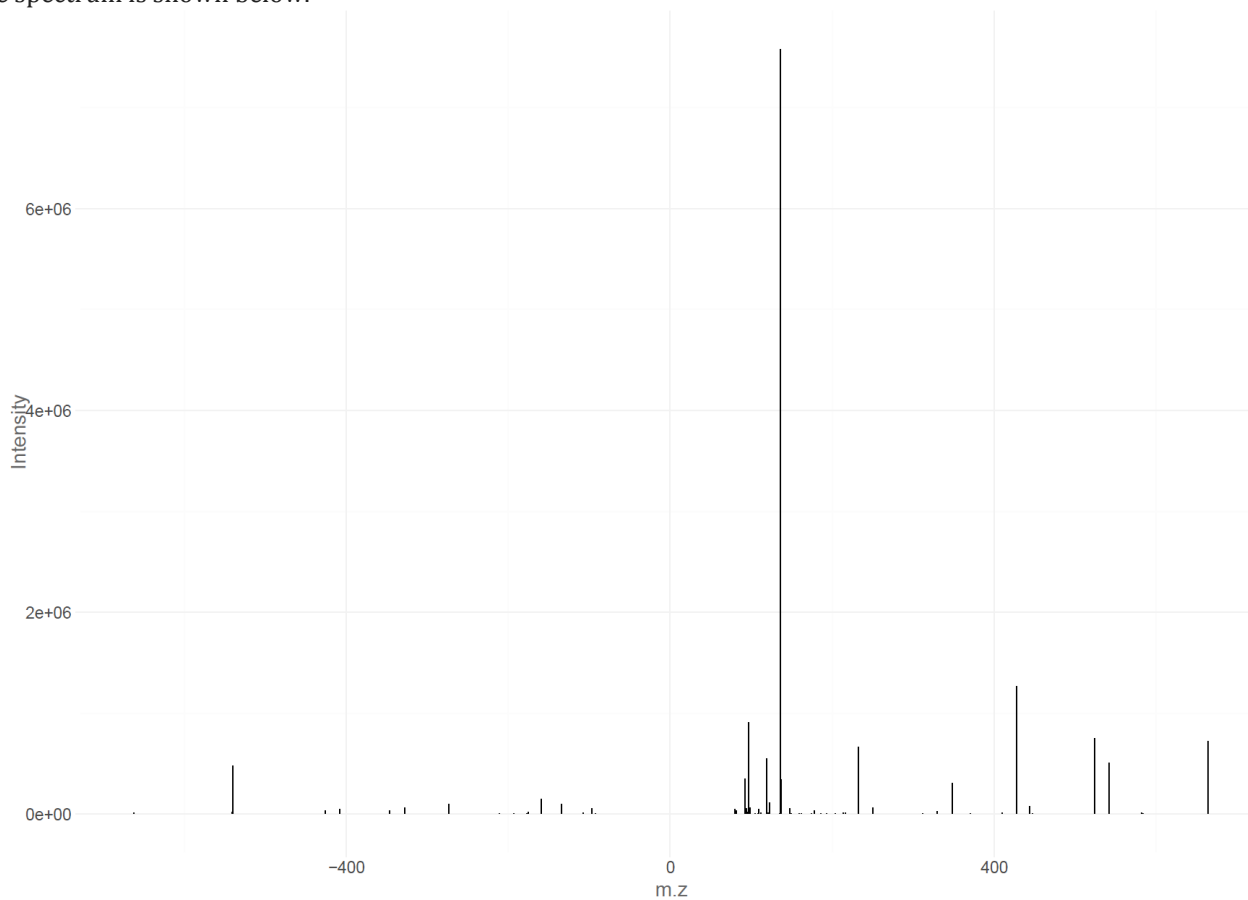

## SUPPLEMENT S10. FRAGMENTATION SPECTRUM OF GLUTAMATE

Spectra taken at collision energies 0, 10, 20, 40, 60, 90, and 120 were averaged from both positive and negative mode. The composite spectrum is shown below.

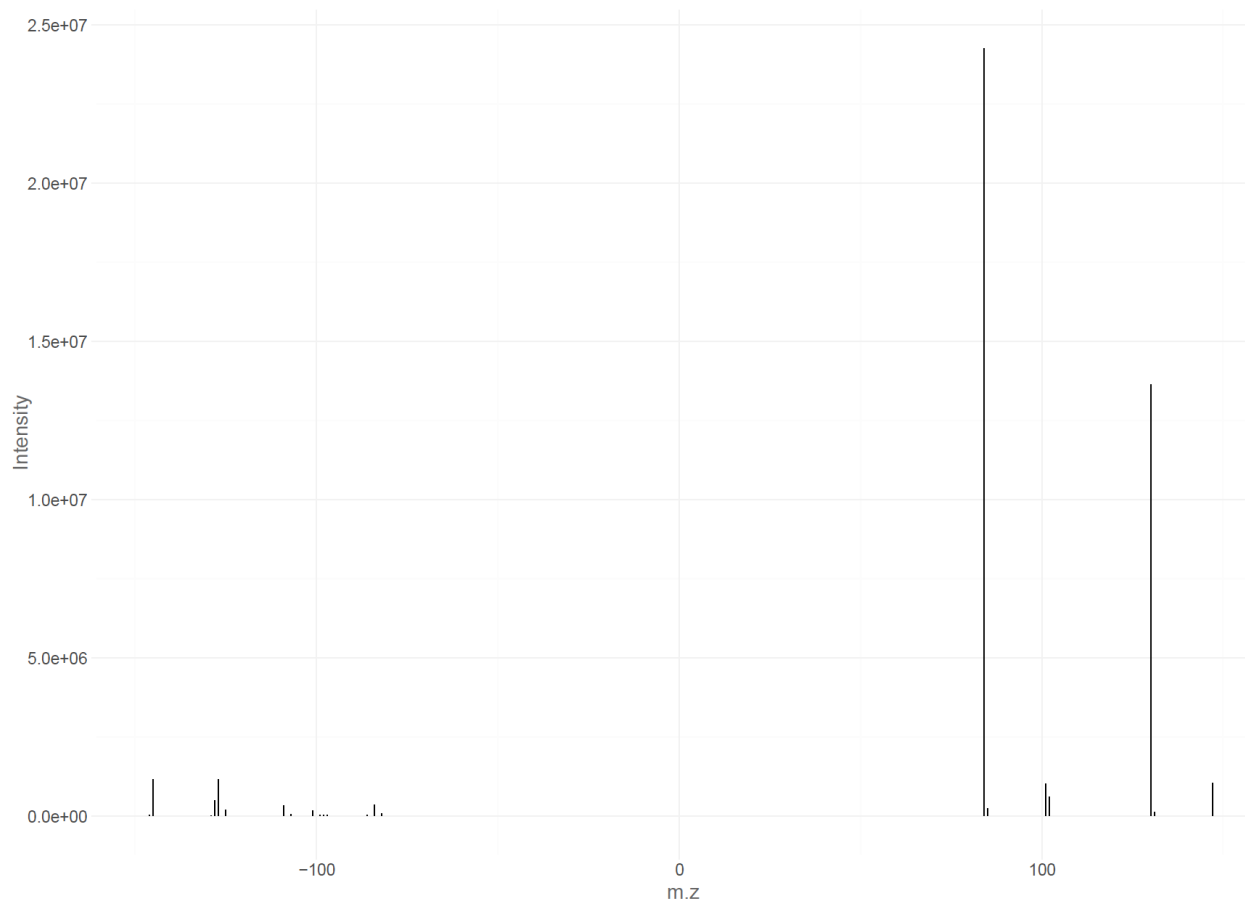

## SUPPLEMENT S11. ANNOTATION OF 2-HYDROXYGLUTARATE METABOLIC PRODUCTS

2-Hydroxyglutarate (2HG) corresponds to the node with a thick black border. Large nodes are features. Small nodes are relationships. Red nodes were detected as enriched by  $X^{13}\text{CMS}$ . Grey nodes were not detected as enriched by  $X^{13}\text{CMS}$ .

Analysis by mz.unity revealed that all enriched features were transformations of 2HG. This indicates that 2HG is not significantly metabolized in colorectal cancer cells.<sup>14</sup>

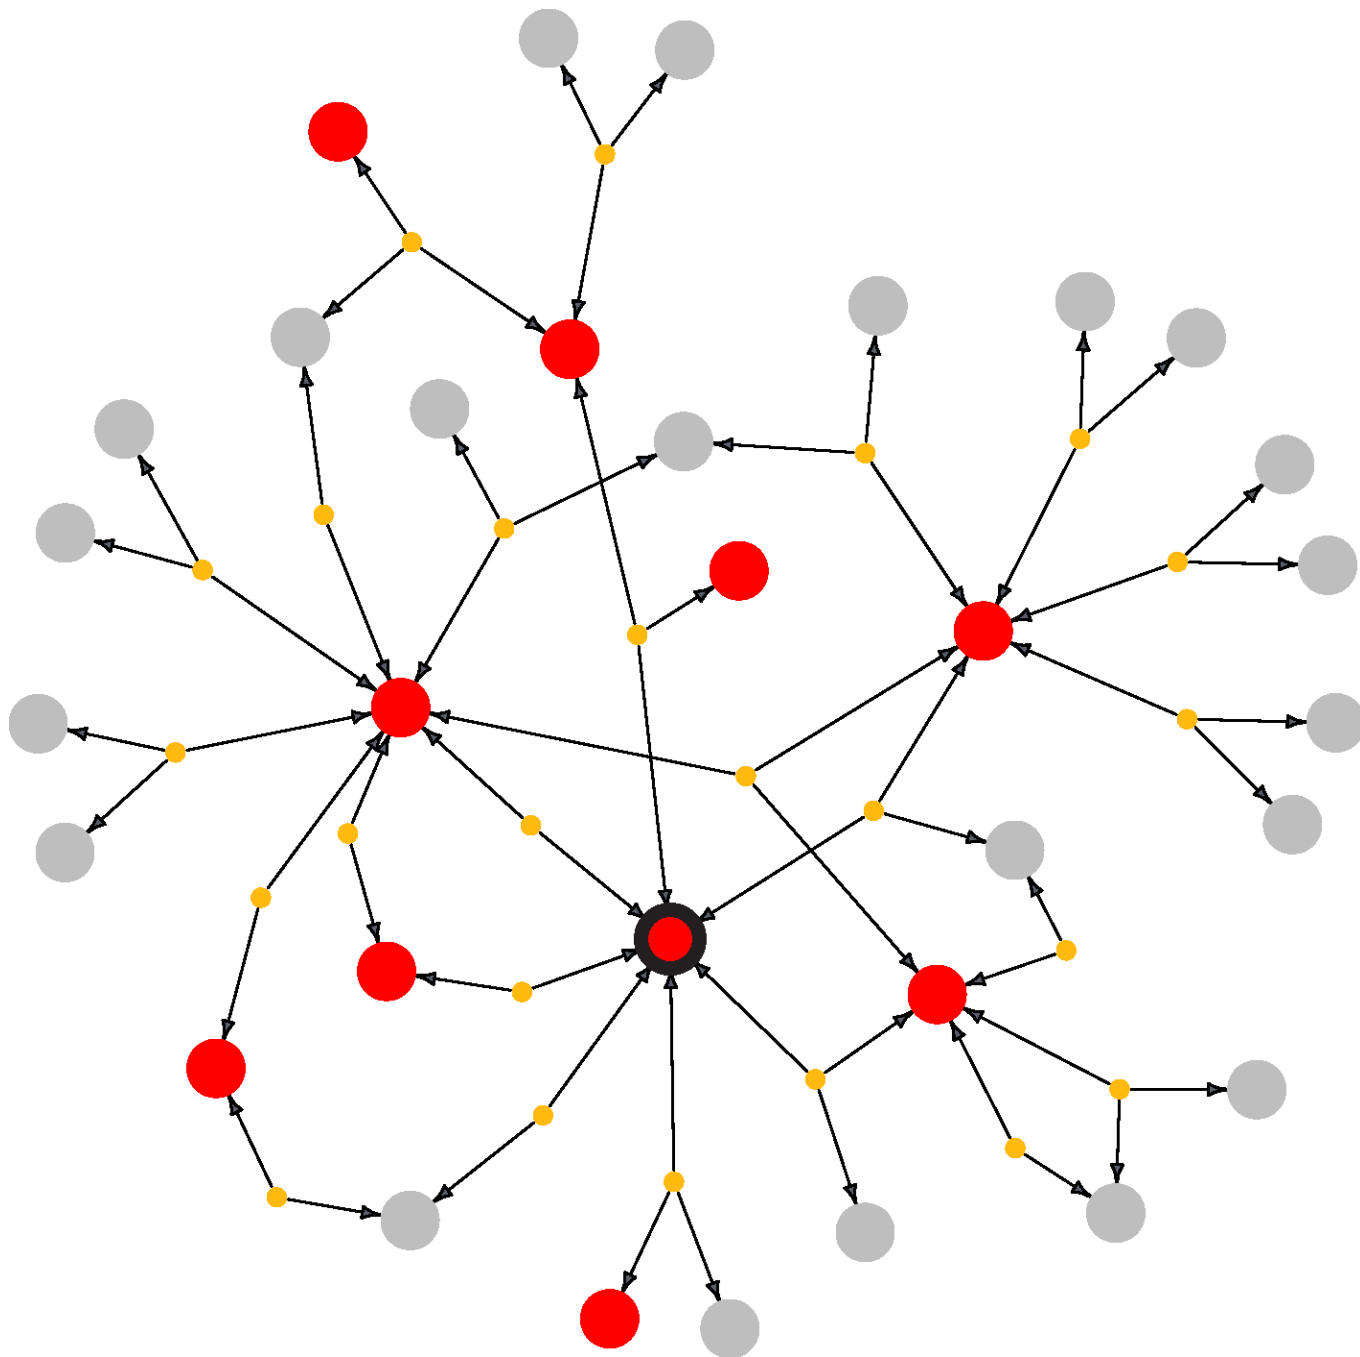

(14) Gelman, S. J.; Mahieu, N. G.; Cho, K.; Llufrío, E. M.; Wencewicz, T. A.; Patti, G. J. *Cancer Metab.* **2015**, 3 (1), 1.

**SUPPLEMENT S12. INTENSITIES, MASSES, AND RETENTION TIMES OF ADDUCTS**

Maximum intensities from each chromatogram are inset. Retention times are in seconds. Masses from top to bottom and left to right: A, 146.0455, 168.0273, 184.0012; B, 146.0455, 662.1015, 809.1547; C, 146.0455, 98.0246, 436.0948.

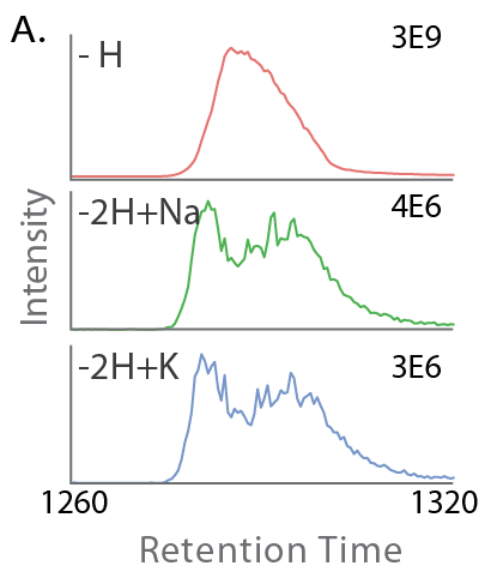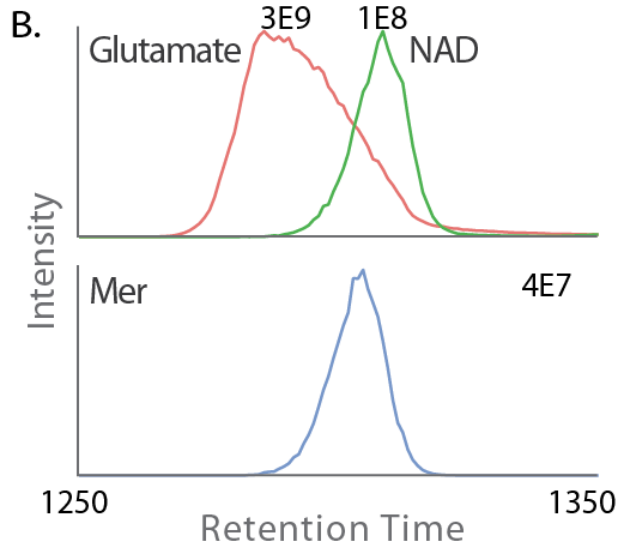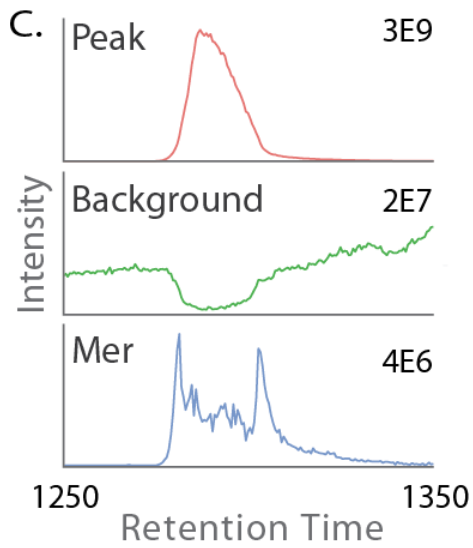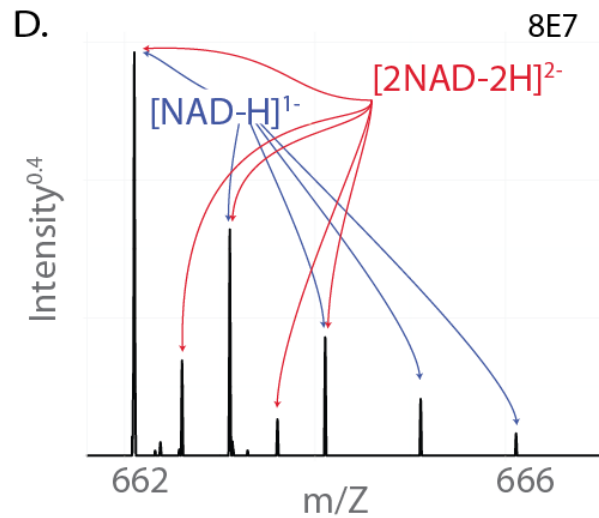

Supplement: NIHMS1010857-supplement-S1-S12.pdf [file NIHMS1010857-supplement-S1-S12.pdf]
